# Supplementary material for: ARTD10 substrate identification on protein microarrays: regulation of GSK3β by mono-ADP-ribosylation
Source: PubMed Central journal article supplement (PMC3627616; doi:10.1186/1478-811x-11-5), 2013-01-19

# Additional figure 1

A

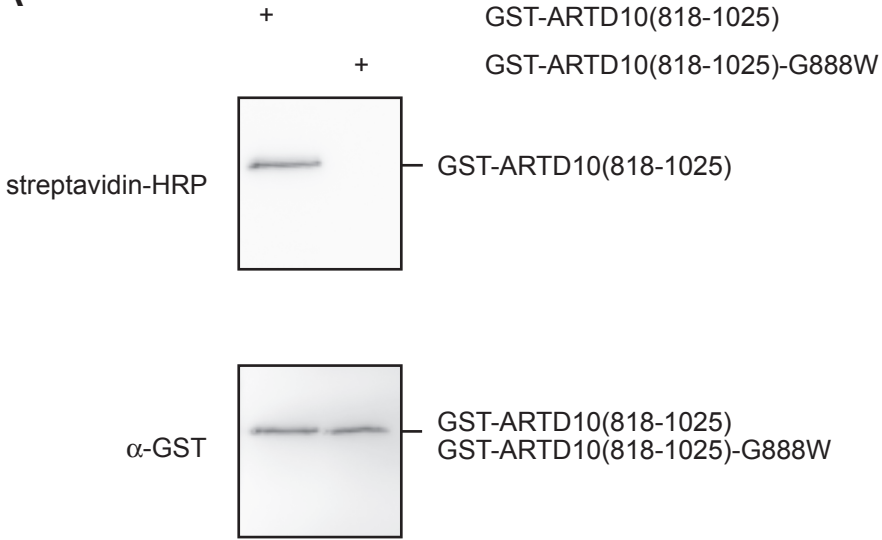

B

ARTD10

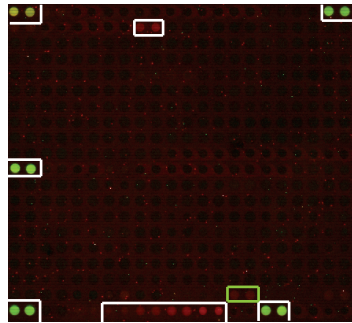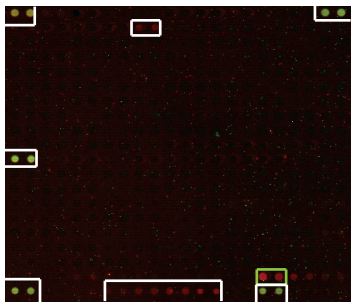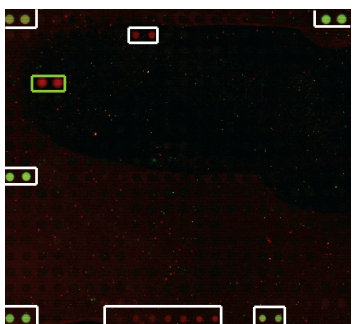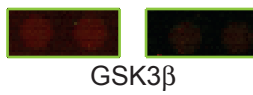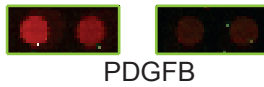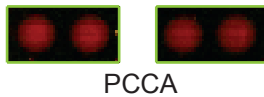

ARTD8

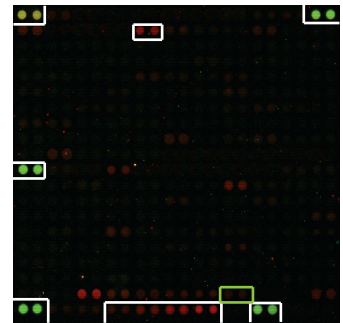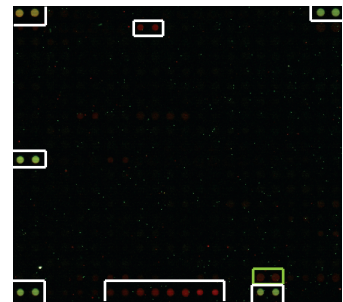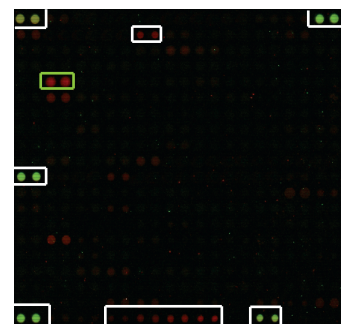

Supplement: 1478-811X-11-5-S1.pdf [file 1478-811X-11-5-S1.pdf]
