# Supplementary material for: ARTD10 substrate identification on protein microarrays: regulation of GSK3β by mono-ADP-ribosylation
Source: PubMed Central journal article supplement (PMC3627616; doi:10.1186/1478-811x-11-5), 2013-01-19
Supplement: 1478-811X-11-5-S5.pdf [file 1478-811X-11-5-S5.pdf]

## Additional figure 2

HA-ARTD10

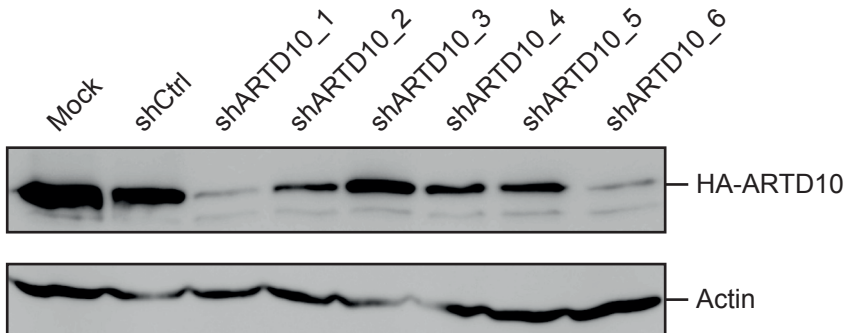

Ratio

1.00 1.07 0.07 0.18 1.50 0.33 0.18 0.02
