# Supplementary material for: ARTD10 substrate identification on protein microarrays: regulation of GSK3β by mono-ADP-ribosylation
Source: Springer Nature journal article supplement (doi:10.1186/1478-811x-11-5), 2013-01-19
Supplement: 12964_2012_310_MOESM2_ESM.pdf [file 12964_2012_310_MOESM2_ESM.pdf]

Additional table 1: list of identified ARTD10 substrates

| ProtoArray Identifier | Uniprot Identifier | Full protein name                                                   | Z-score | Comments              |
|-----------------------|--------------------|---------------------------------------------------------------------|---------|-----------------------|
| PHG0046               | PDGFB_HUMAN        | Platelet-derived growth factor subunit B                            | 28,0    | Validated             |
| NM_000282.1           | Q5JTW5_HUMAN       | Propionyl coenzyme A carboxylase, alpha polypeptide                 | 20,9    | Biotin-binding enzyme |
| histone               |                    | Histone (unfractionated whole histone)                              | 18,3    | Known substrate       |
| Histone_F2a2          |                    | Histones H2A and H4                                                 | 9,8     | Known substrate       |
| PHC1244               | CCL19_HUMAN        | Chemokine (C-C motif) ligand 19                                     | 9,7     |                       |
| PHC0215               | IL21_HUMAN         | Interleukin-21                                                      | 9,4     |                       |
| BC038838.1            | PRR16_HUMAN        | Proline-rich protein 16                                             | 7,5     |                       |
| BC012109.1            | HOME2_HUMAN        | Homer protein homolog 2                                             | 7,0     |                       |
| NM_020166.2           | G5E9X5_HUMAN       | Methylcrotonoyl-Coenzyme A carboxylase 1 (alpha) (MCCC1)            | 6,6     | Biotin binding enzyme |
| NM_004113.3           | FGF12_HUMAN        | Fibroblast growth factor 12                                         | 6       |                       |
| PV3612                | STK6_HUMAN         | Aurora kinase A                                                     | 5,6     |                       |
| PV3353                | NEK6_HUMAN         | Serine/threonine-protein kinase Nek6                                | 5,5     |                       |
| PV4877                | ACVR1_HUMAN        | Activin receptor type-1                                             | 5,3     | Validated             |
| PV3270                | GSK3A_HUMAN        | Glycogen synthase kinase alpha                                      | 5,1     |                       |
| BC030711.2            |                    | C2orf13                                                             | 5,0     |                       |
| PV4883                | ACVL1_HUMAN        | Serine/threonine-protein kinase receptor R3                         | 4,9     |                       |
| PV3501                | PLK1_HUMAN         | Polo-like kinase 1                                                  | 4,8     |                       |
| NM_032459.1           | EFS_HUMAN          | Embryonal Fyn-associated substrate                                  | 4,8     |                       |
| PV3973                | KGP2_HUMAN         | cGMP-dependent protein kinase 2                                     | 4,8     |                       |
| NM_173597.1           |                    | Hypothetical protein FLJ37587 (FLJ37587)                            | 4,8     |                       |
| PV3878                | MARK2_HUMAN        | Serine/threonine-protein kinase MARK2                               | 4,7     |                       |
| PV3688                | EPHA2_HUMAN        | Ephrin type-A receptor 2                                            | 4,7     |                       |
| PHC1346               | SDF1_HUMAN         | Stromal cell-derived factor 1 (CXCL12)                              | 4,6     |                       |
| PV3665                | KC1D_HUMAN         | Casein kinase I isoform delta                                       | 4,6     |                       |
| P2287                 | KPCD_HUMAN         | Protein kinase C delta type                                         | 4,6     |                       |
| PHC1055               | CCL5_HUMAN         | C-C motif chemokine 5 (RANTES)                                      | 4,5     |                       |
| PV3826                | CLK3_HUMAN         | Dual specificity protein kinase CLK3                                | 4,4     |                       |
| PHC0045               | IL4_HUMAN          | Interleukin-4                                                       | 4,4     |                       |
| BC025700.1            | AFF4_HUMAN         | AF/FMR2 family, member 4                                            | 4,2     |                       |
| PV3365                | GSK3B_HUMAN        | Glycogen synthase kinase beta                                       | 4,2     | Validated             |
| PV4838                | NR1I3_HUMAN        | Nuclear receptor subfamily 1 group I member 3                       | 4,2     |                       |
| BC009327.2            | NXN_HUMAN          | Nucleoredoxin                                                       | 4,1     |                       |
| PV3371                | BMX_HUMAN          | Cytoplasmic tyrosine-protein kinase BMX                             | 4,0     |                       |
| NM_016096.1           | ZN706_HUMAN        | Zinc finger protein 706                                             | 4       |                       |
| PV3857                | KSYK_HUMAN         | Tyrosine-protein kinase SYK                                         | 3,8     |                       |
| PV3868                | CDK7_HUMAN         | Cyclin-dependent kinase 7                                           | 3,8     |                       |
| PV3658                | EPHB3_HUMAN        | Ephrin type-B receptor 3                                            | 3,6     |                       |
| La                    | LA_HUMAN           | Lupus La protein                                                    | 3,6     |                       |
| PV3361                | ARBK1_HUMAN        | Beta-adrenergic receptor kinase 1                                   | 3,6     |                       |
| PV4875                | IKKE_HUMAN         | Inhibitor of nuclear factor kappa-B kinase subunit epsilon          | 3,5     | Validated             |
| BC024725.1            | ANR50_HUMAN        | Ankyrin repeat domain-containing protein 5                          | 3,5     |                       |
| NM_004123.1           | GIP_HUMAN          | Gastric inhibitory polypeptide                                      | 3,5     |                       |
| PV4762                | THA_HUMAN          | Thyroid hormone receptor alpha                                      | 3,5     |                       |
| PHC1066               |                    | chemokine (C-X-C motif) ligand 1                                    | 3,5     |                       |
| NM_005639.1           | SYT1_HUMAN         | Synaptotagmin-1                                                     | 3,5     |                       |
| PV4131                | CCNT1_human        | Cyclin T1                                                           | 3,4     | Validated             |
| PV3686                | DAPK3_HUMAN        | Death-associated protein kinase 3                                   | 3,3     |                       |
| PV3869                | KIT_HUMAN          | Mast/stem cell growth factor receptor Kit mutant protein: KIT T670I | 3,3     |                       |
| TopoI                 | TOP1_HUMAN         | DNA topoisomerase 1                                                 | 3,2     |                       |
| PV3500                | KC1E_HUMAN         | Casein kinase I isoform epsilon                                     | 3,2     |                       |
| PV3267                | CDK2_HUMAN         | Cyclin-dependent kinase 2                                           | 3,2     |                       |
| P3081                 | KIT_HUMAN          | Mast/stem cell growth factor receptor Kit                           | 3,2     |                       |
| BC020726.1            | SCEL_HUMAN         | Sciellin                                                            | 3,2     |                       |
| PV3144                | NTRK1_HUMAN        | High affinity nerve growth factor receptor                          | 3,2     |                       |
| BC008623.1            | ROBO3_HUMAN        | Roundabout homolog 3                                                | 3,2     |                       |
| NM_152615.1           | PAR15_HUMAN        | Poly [ADP-ribose] polymerase 15                                     | 3,1     | NAD-consuming enzyme  |
| BC031691.2            | SLAI2_HUMAN        | SLAIN motif-containing protein 2                                    | 3,1     |                       |
| XM_378350.2           |                    | hypothetical protein LOC400027 isoform 1                            | 3,1     |                       |
| PV3851                | MARK4_HUMAN        | MAP/microtubule affinity-regulating kinase 4                        | 3,1     |                       |
| PV3806                | FER_HUMAN          | Tyrosine-protein kinase Fer                                         | 3,1     |                       |
| BC002448.2            | ABLM1_HUMAN        | Actin-binding LIM protein 1                                         | 3,1     |                       |
| PV4205                | KCC2B_HUMAN        | Calcium/calmodulin-dependent protein kinase type II subunit beta    | 3,1     |                       |
| NM_172160.1           | KCAB1_HUMAN        | Voltage-gated potassium channel subunit beta-1                      | 3,1     |                       |
| NM_004329.1           | BMR1A_HUMAN        | Bone morphogenetic protein receptor type-1A                         | 3,1     |                       |
| NM_032765.1           | TRI52_HUMAN        | Tripartite motif-containing protein 52                              | 3,1     |                       |
| BC062353.1            |                    | C1orf131                                                            | 3,1     |                       |
| PV4823                | MELK_HUMAN         | Maternal embryonic leucine zipper kinase                            | 3,0     |                       |
| PV3969                | DAPK1_human        | Death-associated protein kinase 1                                   | 3,0     |                       |
| PV3146                | FGFR1_HUMAN        | Fibroblast growth factor receptor 1                                 | 3,0     |                       |
| NM_144602.1           |                    | C16orf78                                                            | 3       |                       |

|             |              |                                                           |     |
|-------------|--------------|-----------------------------------------------------------|-----|
| NM_017588.1 | WDR5_HUMAN   | WD repeat-containing protein 5                            | 3   |
| NM_002013.2 | FKB15_HUMAN  | FK506-binding protein 15                                  | 2,9 |
| NM_003403.3 | TTY1_HUMAN   | Transcriptional repressor protein YY1                     | 2,8 |
| PV3000      | CDK5_human   | Cyclin-dependent kinase 5                                 | 2,8 |
| BC005008.1  | CEAM5_HUMAN  | Carcinoembryonic antigen-related cell adhesion molecule 5 | 2,7 |
| NM_206834.1 |              | C6orf201                                                  | 2,7 |
| BC000931.2  | ATPG_HUMAN   | ATP synthase subunit gamma, mitochondrial                 | 2,7 |
| PV4788      | C9JAM9_HUMAN | Phosphoinositide-3-kinase, catalytic, alpha polypeptide   | 2,6 |
| BC004925.1  | GPC5C_HUMAN  | G-protein coupled receptor family C group 5 member C      | 2,6 |
| P2291       | KPCB_HUMAN   | Protein kinase C beta type                                | 2,6 |
| NM_138818.1 | PRUNE_HUMAN  | Protein prune homolog                                     | 2,5 |
