# Supplementary material for: ARTD10 substrate identification on protein microarrays: regulation of GSK3β by mono-ADP-ribosylation
Source: Springer Nature journal article supplement (doi:10.1186/1478-811x-11-5), 2013-01-19
Supplement: 12964_2012_310_MOESM3_ESM.pdf [file 12964_2012_310_MOESM3_ESM.pdf]

Additional table 2: list of identified ARTD8 substrates

| ProtoArray Identifier | Uniprot Identifier | Full-length protein name                                            | Z-score | Comments              |
|-----------------------|--------------------|---------------------------------------------------------------------|---------|-----------------------|
| CENPB                 | CENPB_HUMAN        | Major centromere autoantigen B                                      | 26,1    |                       |
| NM_138565.1           | SRC8_HUMAN         | Src substrate cortactin                                             | 21,6    |                       |
| NM_000282.1           | Q5JTW5_HUMAN       | Propionyl coenzyme A carboxylase, alpha polypeptide                 | 21,3    | Biotin-binding enzyme |
| NM_032345.1           | F8VT68_HUMAN       | Within bgcn homolog (Drosophila)                                    | 15,0    |                       |
| NM_007285.5           | GBRL2_HUMAN        | Gamma-aminobutyric acid receptor-associated protein-like 2          | 13,9    |                       |
| NM_003403.3           | TYY1_HUMAN         | Transcriptional repressor protein YY1                               | 11,6    |                       |
| NM_004965.3           | HMG1_HUMAN         | Non-histone chromosomal protein HMG-14                              | 10,8    |                       |
| NM_152434.1           | F8W6W6_HUMAN       | CWF19-like 2, cell cycle control (S. pombe)                         | 9,9     |                       |
| NM_015640.1           | PAIRB_HUMAN        | Plasminogen activator inhibitor 1 RNA-binding protein               | 9,3     |                       |
| Histone_F2a2          |                    | Histones H2A and H4                                                 | 9,2     |                       |
| NM_032141.1           | NSRP1_HUMAN        | Nuclear speckle splicing regulatory protein 1                       | 8,9     |                       |
| NM_144659.1           | TCP1L_HUMAN        | T-complex protein 10A homolog 2                                     | 8,6     |                       |
| BC005004.1            | FA64A_HUMAN        | Protein FAM64A                                                      | 8,6     |                       |
| NM_133336.1           | NSD2_HUMAN         | Probable histone-lysine N-methyltransferase NSD2                    | 8,5     |                       |
| PV4552                | VDR_HUMAN          | Vitamin D3 receptor                                                 | 8,4     |                       |
| histone               |                    | Histone (unfractionated whole histone)                              | 8,2     |                       |
| BC030711.2            |                    | C2orf13                                                             | 8,1     |                       |
| PV3186                | KPCI_HUMAN         | Protein kinase C iota type                                          | 8,0     |                       |
| PV4762                | THA_HUMAN          | Thyroid hormone receptor alpha                                      | 7,8     |                       |
| NM_024692.3           | CLIP4_HUMAN        | CAP-Gly domain-containing linker protein 4                          | 7,8     |                       |
| BC008623.1            | ROBO3_HUMAN        | Roundabout homolog 3                                                | 7,7     |                       |
| P3049                 | ABL1_HUMAN         | Tyrosine-protein kinase ABL1                                        | 7,7     |                       |
| NM_002013.2           | FKB15_HUMAN        | FK506-binding protein 15                                            | 7,2     |                       |
| NM_004113.3           | FGF12_HUMAN        | Fibroblast growth factor 12                                         | 7,2     |                       |
| NM_032350.3           |                    | C7orf50                                                             | 7,0     |                       |
| NM_005639.1           | SYT1_HUMAN         | Synaptotagmin-1                                                     | 6,8     |                       |
| NM_145865.1           | ANS4B_HUMAN        | Ankyrin repeat and SAM domain-containing protein 4B                 | 6,7     |                       |
| NM_015933.1           | CCD72_HUMAN        | Coiled-coil domain-containing protein 72                            | 6,6     |                       |
| BC053895.1            | IRS1_HUMAN         | Insulin receptor substrate 1                                        | 6,5     |                       |
| PV3973                | KGP2_HUMAN         | cGMP-dependent protein kinase 2                                     | 6,4     |                       |
| PV3366                | F5H1T4_HUMAN       | V-erb-b2 erythroblastic leukemia viral oncogene homolog 2           | 6,3     |                       |
| NM_003295.1           | TCTP_HUMAN         | Translationally-controlled tumor protein                            | 6,3     |                       |
| NM_017949.1           | CUED1_HUMAN        | CUE domain-containing protein 1                                     | 6,3     |                       |
| NM_001023.2           | E5RIP1_HUMAN       | Ribosomal protein S20                                               | 6,2     |                       |
| BC020221.1            | STAC_HUMAN         | SH3 and cysteine-rich domain-containing protein                     | 5,7     |                       |
| BC010125.1            |                    | C3orf37                                                             | 5,6     |                       |
| NM_014583.2           | LMCD1_HUMAN        | LIM and cysteine-rich domains protein 1                             | 5,5     |                       |
| PV3249                | CSF1R_HUMAN        | Macrophage colony-stimulating factor 1 receptor                     | 5,5     |                       |
| TopoI                 | TOP1_HUMAN         | DNA topoisomerase 1                                                 | 5,2     |                       |
| PV3967                | FLT3_HUMAN         | Receptor-type tyrosine-protein kinase FLT3; D835Y                   | 5,2     |                       |
| BC051688.1            |                    | hypothetical protein FLJ10781                                       | 5,2     |                       |
| BC033758.1            | Q2V6Q1_HUMAN       | Centaurin alpha 2                                                   | 5,1     |                       |
| PV4211                | M4K2_HUMAN         | Mitogen-activated protein kinase kinase kinase kinase 2             | 5,1     |                       |
| BC025700.1            | AFF4_HUMAN         | AF/FMR2 family, member 4                                            | 5,1     |                       |
| BC017070.1            | CLUA1_HUMAN        | Clusterin-associated protein 1                                      | 5,0     |                       |
| PV4131                | CCNT1_human        | Cyclin T1                                                           | 5,0     |                       |
| NM_080390.3           | TAL2_HUMAN         | Transcription elongation factor A protein-like 2                    | 5,0     |                       |
| NM_134323.1           | TRBP2_HUMAN        | RISC-loading complex subunit TARBP2                                 | 4,9     |                       |
| PV3815                | B4DLT4_HUMAN       | Ribosomal protein S6 kinase, 70kDa, polypeptide 1                   | 4,9     |                       |
| BC024725.1            | ANR50_HUMAN        | Ankyrin repeat domain-containing protein 5                          | 4,8     |                       |
| NM_020166.2           | G5E9X5_HUMAN       | Methylcrotonoyl-Coenzyme A carboxylase 1 (alpha) (MCCC1)            | 4,8     | Biotin-binding enzyme |
| NM_178151.1           | DCX_HUMAN          | Neuronal migration protein doublecortin                             | 4,7     |                       |
| PV3869                | KIT_HUMAN          | Mast/stem cell growth factor receptor Kit mutant protein: KIT T670I | 4,7     |                       |
| NM_017588.1           | WDR5_HUMAN         | WD repeat-containing protein 5                                      | 4,7     |                       |
| PHG0046               | PDGFB_HUMAN        | Platelet-derived growth factor subunit B                            | 4,6     |                       |
| PV3879                | PKN2_HUMAN         | Serine/threonine-protein kinase N2                                  | 4,5     |                       |
| NM_002822.1           | TWF1_HUMAN         | Twinfilin-1                                                         | 4,5     |                       |
| PV3299                | MAPK3_HUMAN        | MAP kinase-activated protein kinase 3                               | 4,5     |                       |
| PV3792                | TTK_HUMAN          | Dual specificity protein kinase TTK                                 | 4,5     |                       |
| NM_018553.1           |                    | C17orf85                                                            | 4,5     |                       |
| NM_015414.2           | (RL36_HUMAN)       | 60S ribosomal protein L36                                           | 4,5     |                       |
| PV3836                | IKKB_HUMAN         | Inhibitor of nuclear factor kappa-B kinase subunit beta             | 4,5     |                       |
| PV3822                | M3K2_HUMAN         | Mitogen-activated protein kinase kinase kinase 2                    | 4,4     |                       |
| PV4792                | SIK2_HUMAN         | Serine/threonine-protein kinase SIK2                                | 4,4     |                       |
| PV3829                | SRPK2_HUMAN        | SFRS protein kinase 2 (SRPK2), transcript variant 2                 | 4,4     |                       |
| NM_005801.2           | EIF1_HUMAN         | Eukaryotic translation initiation factor 1                          | 4,4     |                       |
| PV4130                | TOPK_HUMAN         | Lymphokine-activated killer T-cell-originated protein kinase        | 4,4     |                       |
| P2251                 | KPCB_HUMAN         | Protein kinase C beta type                                          | 4,3     |                       |
| NM_021627.2           | SEN2_HUMAN         | Sentrin-specific protease 2                                         | 4,3     |                       |
| BC026345.1            | ERMIN_HUMAN        | Ermin                                                               | 4,3     |                       |
| PV3857                | KSYK_HUMAN         | Tyrosine-protein kinase SYK                                         | 4,3     |                       |
| BC001728.1            | TFPT_HUMAN         | TCF3 fusion partner                                                 | 4,3     |                       |
| NM_032765.1           | TRI52_HUMAN        | Tripartite motif-containing protein 52                              | 4,3     |                       |
| PV4129                | VGFR3_HUMAN        | Vascular endothelial growth factor receptor 3                       | 4,2     |                       |
| NM_199124.1           |                    | C11orf63                                                            | 4,2     |                       |
| BC056415.1            | RPAP3_HUMAN        | RNA polymerase II-associated protein 3                              | 4,2     |                       |

|             |               |                                                               |                          |
|-------------|---------------|---------------------------------------------------------------|--------------------------|
| PV3371      | BMX_HUMAN     | Cytoplasmic tyrosine-protein kinase BMX                       | 4,1                      |
| BC017227.1  | PHLP_HUMAN    | Phosducin-like protein                                        | 4,1                      |
| PV3808      | INSRR_HUMAN   | Insulin receptor-related protein                              | 4,1                      |
| NM_020836.2 | BEGIN_HUMAN   | Brain-enriched guanylate kinase-associated protein            | 4,1                      |
| NM_013242.1 |               | C16orf80                                                      | 4,1                      |
| NM_025241.1 | UBXN6_HUMAN   | UBX domain-containing protein 6                               | 4,1                      |
| PV4883      | ACVL1_HUMAN   | Serine/threonine-protein kinase receptor R3                   | 4,1                      |
| BC001132.1  | DDX54_HUMAN   | ATP-dependent RNA helicase DDX54                              | 4,0                      |
| BC050616.1  | TSSC4_HUMAN   | Protein TSSC4                                                 | 4,0                      |
| PV3817      | WEE1_HUMAN    | Wee1-like protein kinase                                      | 4,0                      |
| BC062353.1  |               | C1orf131                                                      | 4,0                      |
| NM_005038.1 | PPID_HUMAN    | Peptidyl-prolyl cis-trans isomerase D                         | 3,9                      |
| PV3660      | VGFR2_HUMAN   | Vascular endothelial growth factor receptor 2                 | 3,9                      |
| PV3146      | FGFR1_HUMAN   | Fibroblast growth factor receptor 1                           | 3,8                      |
| NM_001571.2 | IRF3_HUMAN    | Interferon regulatory factor 3                                | 3,8                      |
| PV3657      | STK25_HUMAN   | Serine/threonine-protein kinase 25                            | 3,8                      |
| NM_014047.1 |               | C19orf53                                                      | 3,6                      |
| NM_198501.1 | SMTL2_HUMAN   | Smoothelin-like protein 2                                     | 3,6                      |
| PV4674      | AAPK2_HUMAN   | 5'-AMP-activated protein kinase catalytic subunit alpha-2     | 3,6                      |
| NM_016096.1 | ZN706_HUMAN   | Zinc finger protein 706                                       | 3,6                      |
| P2287       | KPCD_HUMAN    | Protein kinase C delta type                                   | 3,6                      |
| BC000479.1  | B7Z5R1_HUMAN  | V-akt murine thymoma viral oncogene homolog 1                 | 3,6                      |
| PV3785      | DYR1A_HUMAN   | Dual specificity tyrosine-phosphorylation-regulated kinase 1A | 3,6                      |
| PV3501      | PLK1_HUMAN    | Polo-like kinase 1                                            | 3,5                      |
| BC001396.1  |               | C9orf32                                                       | 3,5                      |
| PV4310      | IKKA_HUMAN    | Inhibitor of nuclear factor kappa-B kinase subunit alpha      | 3,5                      |
| P2268       | KPCZ_HUMAN    | Protein kinase C zeta type                                    | 3,5                      |
| PV3251      | EPHB4_HUMAN   | Ephrin type-B receptor 4                                      | 3,5                      |
| PV3878      | MARK2_HUMAN   | Serine/threonine-protein kinase MARK2                         | 3,5                      |
| NM_001014.2 | RS10_HUMAN    | 40S ribosomal protein S10                                     | 3,5                      |
| BC009762.2  | TRI41_HUMAN   | E3 ubiquitin-protein ligase TRIM41                            | 3,4                      |
| NM_003616.2 | G5EA29_HUMAN) | Survival of motor neuron protein interacting protein 1        | 3,4                      |
| NM_016287.2 | HP1B3_HUMAN   | Heterochromatin protein 1-binding protein 3                   | 3,4                      |
| NM_003992.1 | CLK3_HUMAN    | Dual specificity protein kinase CLK3                          | 3,4                      |
| PV4297      | DCLK2_HUMAN   | Serine/threonine-protein kinase DCLK2                         | 3,4                      |
| NM_016483.3 | PHF7_HUMAN    | PHD finger protein 7                                          | 3,4                      |
| NM_018990.1 |               | CXorf9                                                        | 3,4                      |
| PV3789      | PAK3_HUMAN    | Serine/threonine-protein kinase PAK 3                         | 3,4                      |
| NM_024946.1 | F192A_HUMAN   | Protein FAM192A                                               | 3,4                      |
| PV3292      | CDK1_HUMAN    | Cyclin-dependent kinase 1                                     | 3,4                      |
| NM_152615.1 | PAR15_HUMAN   | Poly [ADP-ribose] polymerase 15                               | 3,4 NAD-consuming enzyme |
| PV4803      | EGFR_HUMAN    | Epidermal growth factor receptor                              | 3,4                      |
| P2282       | KPCE_HUMAN    | Protein kinase C epsilon type                                 | 3,3                      |
| BC060828.1  | ARI3A_HUMAN   | AT-rich interactive domain-containing protein 3A              | 3,3                      |
| NM_144594.1 | GTSF1_HUMAN   | Gametocyte-specific factor 1                                  | 3,3                      |
| BC064984.1  | ASXL1_HUMAN   | Putative Polycomb group protein ASXL1                         | 3,3                      |
| PV3819      | RET_HUMAN     | Proto-oncogene tyrosine-protein kinase receptor Ret           | 3,3                      |
| BC011707.1  | NRBF2_HUMAN   | Nuclear receptor-binding factor 2                             | 3,2                      |
| P2782       | ZAP70_HUMAN   | Tyrosine-protein kinase ZAP-70                                | 3,2                      |
| BC029046.1  | H10_HUMAN     | Histone H1.0                                                  | 3,2                      |
| PV3266      | ABL2_HUMAN    | Abelson tyrosine-protein kinase 2                             | 3,2                      |
| PV3354      | FES_HUMAN     | Tyrosine-protein kinase Fes/Fps                               | 3,2                      |
| BC020726.1  | SCEL_HUMAN    | Sciellin                                                      | 3,2                      |
| PV3851      | MARK4_HUMAN   | MAP/microtubule affinity-regulating kinase 4                  | 3,2                      |
| PV4680      | PGFRA_HUMAN   | Platelet-derived growth factor receptor alpha                 | 3,2                      |
| NM_032329.4 | ING5_HUMAN    | Inhibitor of growth protein 5                                 | 3,2 Validated            |
| BC011842.2  |               | hypothetical protein FLJ11184                                 | 3,1                      |
| BC031691.2  | SLAI2_HUMAN   | SLAIN motif-containing protein 2                              | 3,1                      |
| NM_007045.2 | FR1OP_HUMAN   | FGFR1 oncogene partner                                        | 3,1                      |
| NM_033414.1 | ZN622_HUMAN   | Zinc finger protein 622                                       | 3,1                      |
| NM_152763.2 |               | C1orf62                                                       | 3,1                      |
| NM_002363.1 | MAGB1_HUMAN   | Melanoma-associated antigen B1                                | 3,1                      |
| BC009967.1  | NTKL_HUMAN    | N-terminal kinase-like protein                                | 3,1                      |
| PV3301      | MAPK5_HUMAN   | MAP kinase-activated protein kinase 5                         | 3,0                      |
| PV3811      | PGFRA_HUMAN   | Platelet-derived growth factor receptor alpha                 | 3,0                      |
| BC011414.1  |               | C5orf3                                                        | 3,0                      |
| NM_014481.2 | APEX2_HUMAN   | DNA-(apurinic or apyrimidinic site) lyase 2                   | 3,0                      |
| BC051868.2  | UBE2O_HUMAN   | Ubiquitin-conjugating enzyme E2 O                             | 3,0                      |
| NM_023015.3 | INT3_HUMAN    | Integrator complex subunit 3                                  | 3,0                      |
