# Supplementary material for: ARTD10 substrate identification on protein microarrays: regulation of GSK3β by mono-ADP-ribosylation
Source: Springer Nature journal article supplement (doi:10.1186/1478-811x-11-5), 2013-01-19
Supplement: 12964_2012_310_MOESM4_ESM.pdf [file 12964_2012_310_MOESM4_ESM.pdf]

Additional Table 3A: ARTD10 substrates - biological process

| Accession  | Term                                                             | Adjusted P-Value |
|------------|------------------------------------------------------------------|------------------|
| GO:0007167 | enzyme linked receptor protein signaling pathway                 | 6e-05            |
| GO:0032943 | mononuclear cell proliferation                                   | 9e-04            |
| GO:0046777 | protein amino acid autophosphorylation                           | 3e-03            |
| GO:0007242 | intracellular signaling cascade                                  | 5e-03            |
| GO:0007243 | protein kinase cascade                                           | 5e-03            |
| GO:0007169 | transmembrane receptor protein tyrosine kinase signaling pathway | 5e-03            |
| GO:0030509 | BMP signaling pathway                                            | 1e-02            |
| GO:0010463 | mesenchymal cell proliferation                                   | 1e-02            |
| GO:0007179 | transforming growth factor beta receptor signaling pathway       | 1e-02            |
| GO:0007166 | cell surface receptor linked signal transduction                 | 1e-02            |
| GO:0050730 | regulation of peptidyl-tyrosine phosphorylation                  | 1e-02            |
| GO:0016055 | Wnt receptor signaling pathway                                   | 2e-02            |
| GO:0030182 | neuron differentiation                                           | 3e-02            |
| GO:0002521 | leukocyte differentiation                                        | 3e-02            |
| GO:0000278 | mitotic cell cycle                                               | 4e-02            |

Additional Table 3B: ARTD10 substrates - molecular function

| Accession  | Term                                                            | Adjusted P-Value |
|------------|-----------------------------------------------------------------|------------------|
| GO:0004713 | protein tyrosine kinase activity                                | 3e-28            |
| GO:0004674 | protein serine/threonine kinase activity                        | 2e-27            |
| GO:0016772 | transferase activity, transferring phosphorus-containing groups | 4e-20            |
| GO:0032553 | ribonucleotide binding                                          | 2e-13            |
| GO:0017076 | purine nucleotide binding                                       | 5e-13            |
| GO:0050321 | tau-protein kinase activity                                     | 9e-06            |
| GO:0005057 | receptor signaling protein activity                             | 7e-05            |
| GO:0046332 | SMAD binding                                                    | 1e-03            |
| GO:0019838 | growth factor binding                                           | 1e-03            |
| GO:0005102 | receptor binding                                                | 3e-03            |
| GO:0017002 | activin receptor activity                                       | 5e-03            |
| GO:0004715 | non-membrane spanning protein tyrosine kinase activity          | 9e-03            |
| GO:0004697 | protein kinase C activity                                       | 2e-02            |
| GO:0005021 | vascular endothelial growth factor receptor activity            | 4e-02            |

|            |                                          |       |
|------------|------------------------------------------|-------|
| GO:0005003 | ephrin receptor activity                 | 4e-02 |
| GO:0004887 | thyroid hormone receptor activity        | 5e-02 |
| GO:0005136 | interleukin-4 receptor binding           | 6e-02 |
| GO:0035173 | histone kinase activity                  | 6e-02 |
| GO:0004696 | glycogen synthase kinase 3 activity      | 6e-02 |
| GO:0005020 | stem cell factor receptor activity       | 6e-02 |
| GO:0004693 | cyclin-dependent protein kinase activity | 7e-02 |
| GO:0005134 | interleukin-2 receptor binding           | 9e-02 |
| GO:0003708 | retinoic acid receptor activity          | 9e-02 |
| GO:0042802 | identical protein binding                | 9e-02 |
| GO:0048184 | follistatin binding                      | 9e-02 |
| GO:0047696 | beta-adrenergic receptor kinase activity | 9e-02 |

Additional Table 3C: ARTD8 substrates - biological process

| Accession  | Term                                                             | Adjusted P-Value |
|------------|------------------------------------------------------------------|------------------|
| GO:0006468 | protein amino acid phosphorylation                               | 3e-33            |
| GO:0043687 | post-translational protein modification                          | 3e-25            |
| GO:0007169 | transmembrane receptor protein tyrosine kinase signaling pathway | 1e-07            |
| GO:0007167 | enzyme linked receptor protein signaling pathway                 | 2e-07            |
| GO:0018193 | peptidyl-amino acid modification                                 | 1e-06            |
| GO:0008152 | metabolic process                                                | 5e-04            |
| GO:0007242 | intracellular signaling cascade                                  | 5e-04            |
| GO:0007243 | protein kinase cascade                                           | 6e-04            |
| GO:0046777 | protein amino acid autophosphorylation                           | 9e-04            |
| GO:0065007 | biological regulation                                            | 1e-03            |
| GO:0032502 | developmental process                                            | 4e-03            |
| GO:0050730 | regulation of peptidyl-tyrosine phosphorylation                  | 4e-03            |
| GO:0048008 | platelet-derived growth factor receptor signaling pathway        | 4e-02            |
| GO:0010463 | mesenchymal cell proliferation                                   | 4e-02            |
| GO:0007186 | G-protein coupled receptor protein signaling pathway             | 6e-02            |
| GO:0040011 | locomotion                                                       | 8e-02            |

Additional Table 3D: ARTD8 substrates - molecular function

| Accession  | Term                                     | Adjusted P-Value |
|------------|------------------------------------------|------------------|
| GO:0004713 | protein tyrosine kinase activity         | 1e-38            |
| GO:0004674 | protein serine/threonine kinase activity | 4e-38            |
| GO:0016772 | transferase activity, transferring       | 2e-26            |

|            |                                                        |       |
|------------|--------------------------------------------------------|-------|
|            | phosphorus-containing groups                           |       |
| GO:0032553 | ribonucleotide binding                                 | 3e-16 |
| GO:0017076 | purine nucleotide binding                              | 2e-15 |
| GO:0019199 | transmembrane receptor protein kinase activity         | 2e-09 |
| GO:0004715 | non-membrane spanning protein tyrosine kinase activity | 3e-09 |
| GO:0005515 | protein binding                                        | 1e-06 |
| GO:0005021 | vascular endothelial growth factor receptor activity   | 8e-06 |
| GO:0004697 | protein kinase C activity                              | 2e-05 |
| GO:0008384 | IkappaB kinase activity                                | 3e-03 |
| GO:0000287 | magnesium ion binding                                  | 7e-03 |
| GO:0005488 | binding                                                | 9e-03 |
| GO:0042802 | identical protein binding                              | 1e-02 |
| GO:0005057 | receptor signaling protein activity                    | 1e-02 |
| GO:0003824 | catalytic activity                                     | 1e-02 |
| GO:0005161 | platelet-derived growth factor receptor binding        | 3e-02 |
| GO:0046982 | protein heterodimerization activity                    | 6e-02 |
| GO:0019838 | growth factor binding                                  | 6e-02 |
| GO:0004712 | protein serine/threonine/tyrosine kinase activity      | 6e-02 |
| GO:0004709 | MAP kinase kinase kinase activity                      | 8e-02 |
| GO:0008434 | vitamin D3 receptor activity                           | 8e-02 |
| GO:0046983 | protein dimerization activity                          | 8e-02 |
| GO:0004710 | MAP/ERK kinase kinase activity                         | 8e-02 |
| GO:0005020 | stem cell factor receptor activity                     | 8e-02 |
| GO:0004699 | calcium-independent protein kinase C activity          | 8e-02 |
