# Supplementary figures and images for: ARTD10 substrate identification on protein microarrays: regulation of GSK3β by mono-ADP-ribosylation
Source: Springer Nature journal article supplement (doi:10.1186/1478-811x-11-5), 2013-01-19

**A**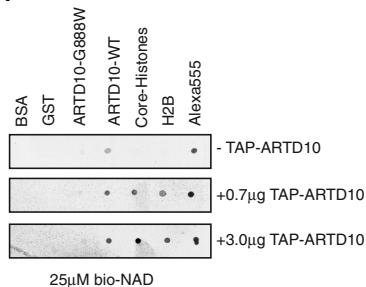**B**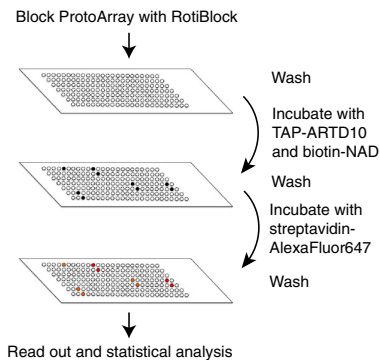**C**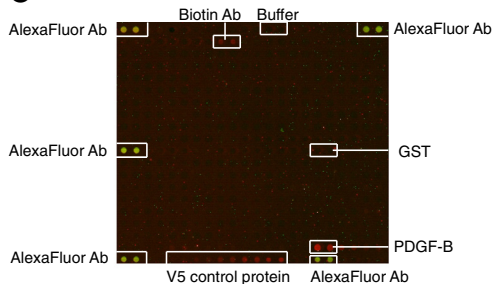**D**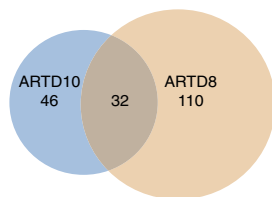**E**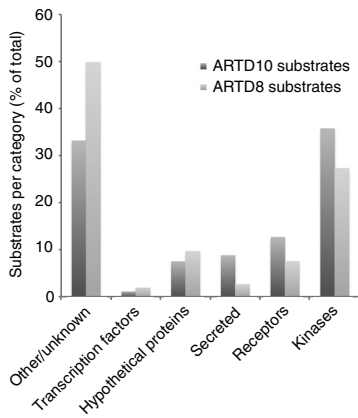

Supplement: 12964_2012_310_MOESM6_ESM.pdf [file 12964_2012_310_MOESM6_ESM.pdf]

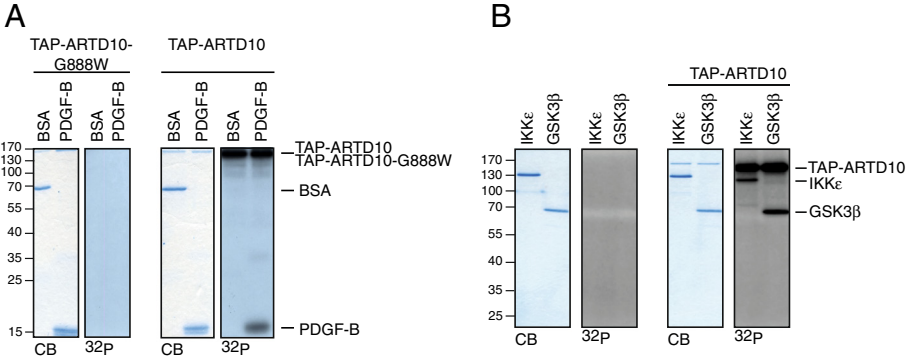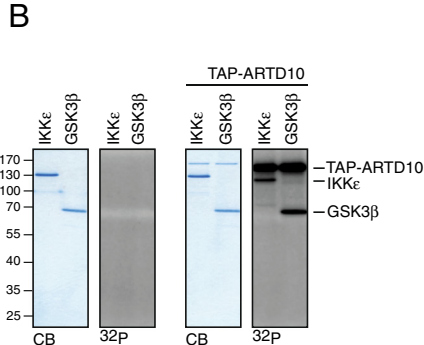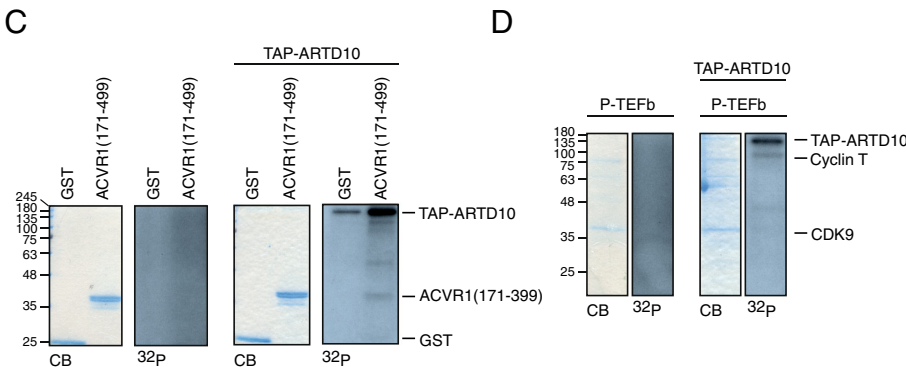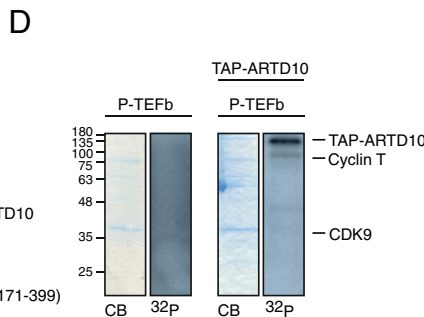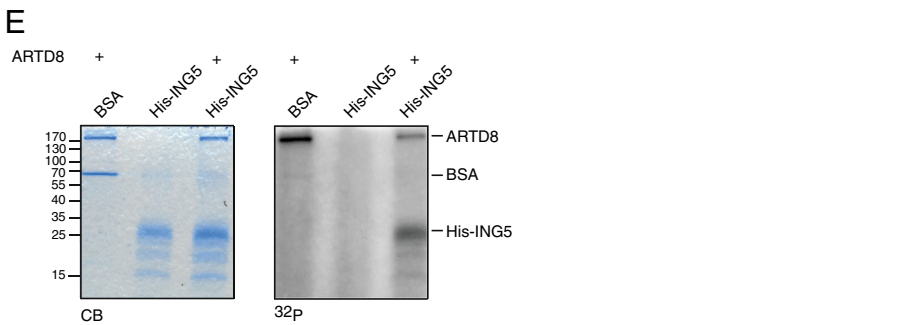

Supplement: 12964_2012_310_MOESM7_ESM.pdf [file 12964_2012_310_MOESM7_ESM.pdf]

**A**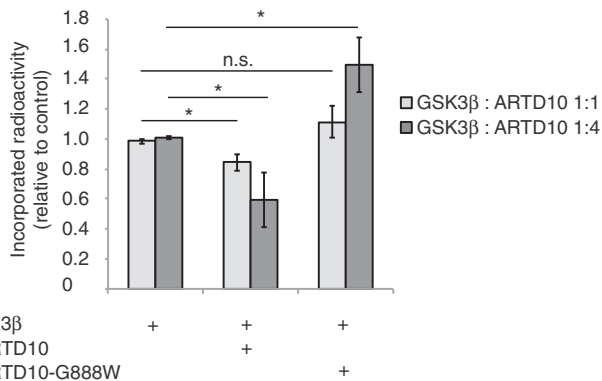**C**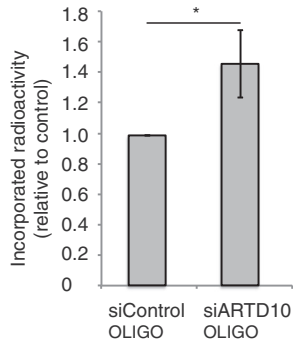**D**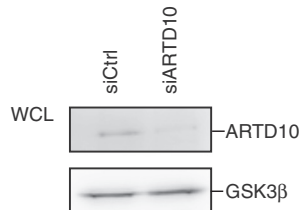**B**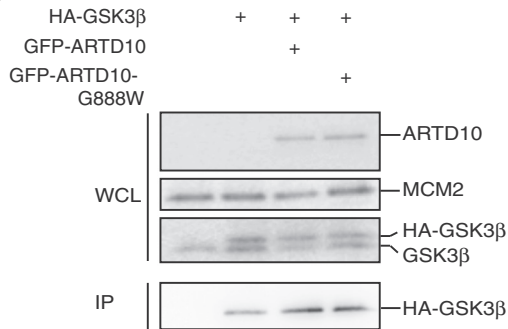**E**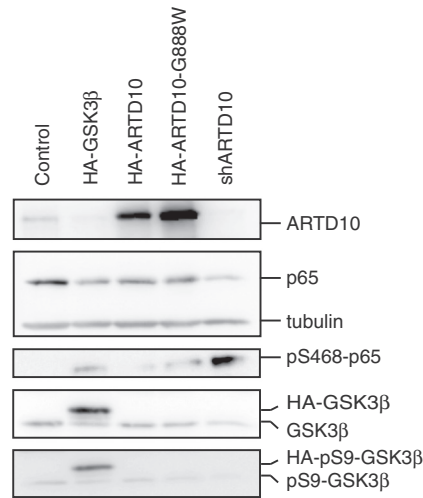

Supplement: 12964_2012_310_MOESM9_ESM.pdf [file 12964_2012_310_MOESM9_ESM.pdf]
